# Supplementary material
Source: publisher site journal article supplement (https://www.dovepress.com/article/458905)
Supplement: Supplementary file 1 [file get_supplementary_file.php]

**Supplementary Table 1.** Technical details of the CT assessments

| **Acquisition** | **Orientation** | **FOV** | **Slice thickness (mm)** | **Interval (mm)** | **Convolution kernel*** |
| --- | --- | --- | --- | --- | --- |
| **Inspiratory** | axial | lung | 1.25-1.50 | 0.70-0.75 | B70f/LUNG/L |
| **Inspiratory** | axial | lung | 0.625-1.00 | 0.50 | B30f/SOFT/B |
| **Inspiratory** | axial | including soft tissue of torso | 0.625-1.00 | 0.50 | B30f/SOFT/B |
| **Expiratory** | axial | lung | 0.625-1.00 | 0.50 | B30f/SOFT/B |

*Vendor-specific generic names for Siemens/GE/Philips

| Scanner models | Siemens Definition Siemens Definition AS 40/ 64/ Flash 128 GE Lightspeed VCT 64/ GE Optima 64/ Philips Brilliance 64/ iCT 256 |
| --- | --- |
|
| Scan Type | Spiral |
| Rotation Time (s) | 0.33 – 0.50 s |
| Collimation | 40 / 64 / 128 x 0.6-0.625 mm |
| Pitch | 0.6-1.0 |
| kVp | 120 kVp |
| mA | 30 - 35 eff. mAs |
| Dose modulation | Off |
| Matrix | 512 x 512 |
| Calibration phantom | Air / water phantom / CatPhan |
| Max. eff dose/scan | < 1.75 mSv |
| Max. eff. overall dose | < 3.50 mSv |


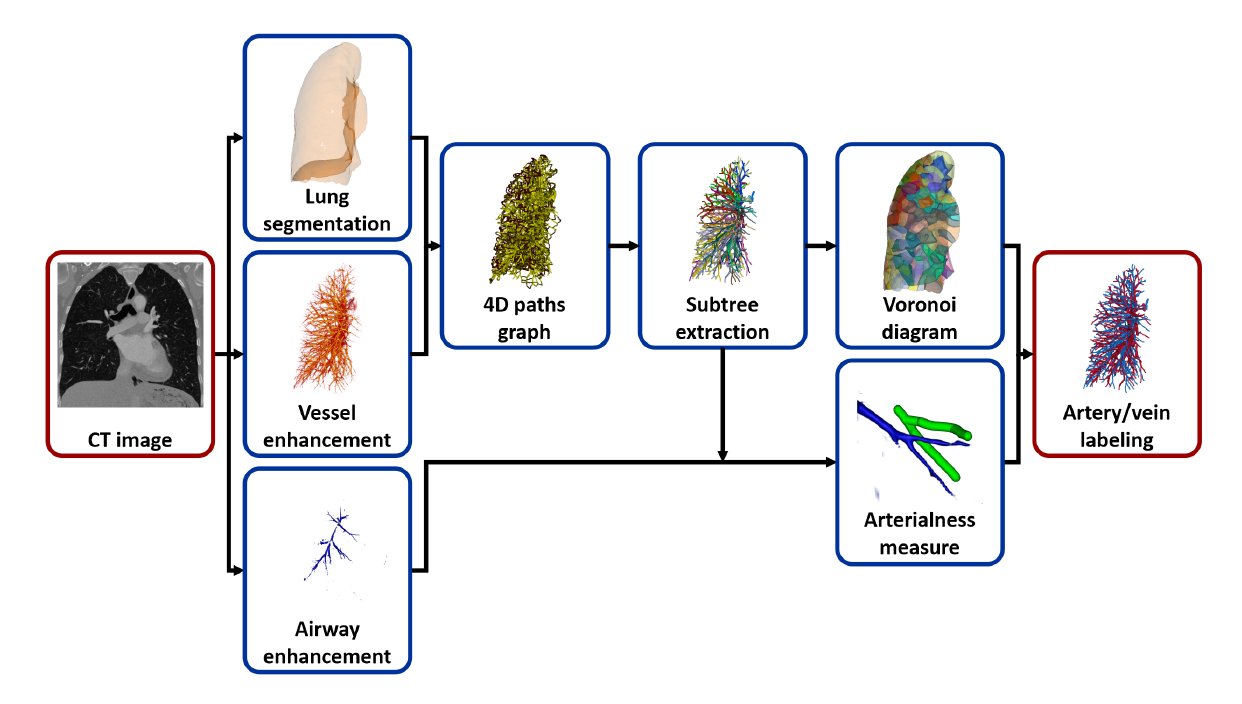


[**Supplementary Figure S1**](https://www.dovepress.com/get_supplementary_file.php?f=438930.docx)**:** Flow chart of the fully-automatic vessel segmentation algorithm. A detailed description and validation of the automatic vessel extraction algorithm is presented in Payer et al. (2016)40. Briefly, input for the software is the CT image stack. After lung segmentation, a multi-scale vessel enhancement filter produces images with a high response for bright tubular structures on a dark background, together with the respective radius and orientation. Following these tubular structures, optimized vessel paths are generated with sub-voxel accuracy. These are then used to reconstruct vessel trees, which are subsequently separated at the bifurcations into individual vessel segments. Only segments with diameters between 2 and 10 mm are included. Finally, the artery/vein labelling is realized by using two anatomical properties. First, we exploit the roughly uniformly distribution of arteries and veins in the lung, maximising the contact surfaces in the Voronoi diagram. And second, we use that bronchi run approximately parallel and in close proximity to the arteries.
